# Supplementary material for: IKAROS regulates human T cell phenotype at a thymic and postthymic level
Source: JCI journal article supplement (doi:10.1172/jci.insight.197359), 2025-12-21
Supplement: sd2 [file 2]

Full unedited gel for Figure 2D

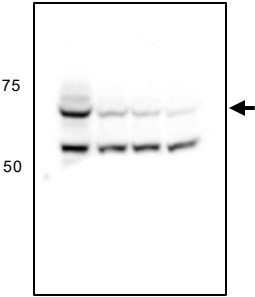

IKAROS

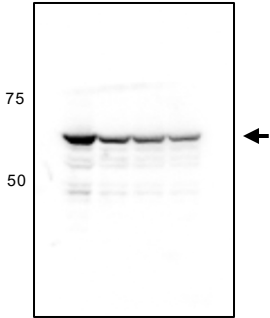

AIOLOS

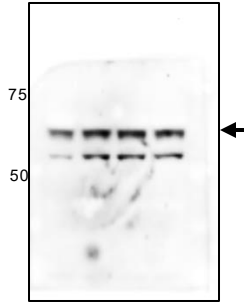

HNRNPLL

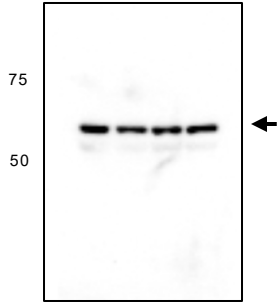

HNRNPL

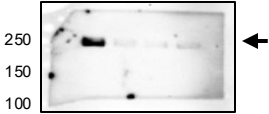

CD45RA

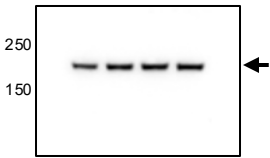

CD45RO

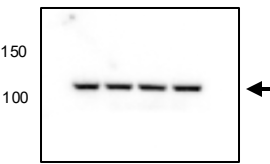

Vinculin

Full unedited gel for Figure 2F

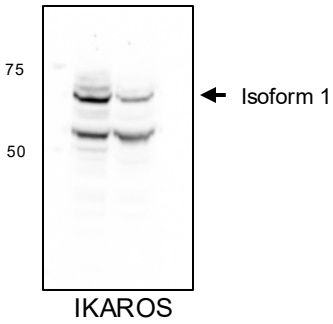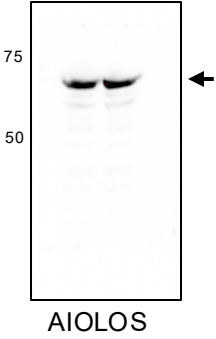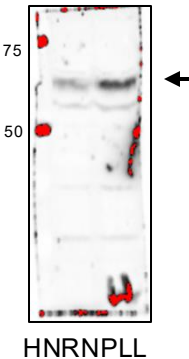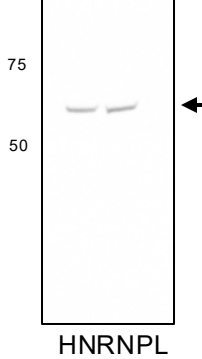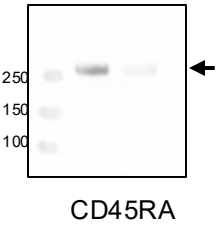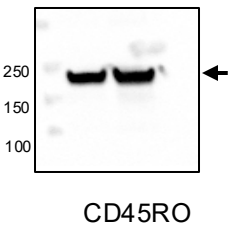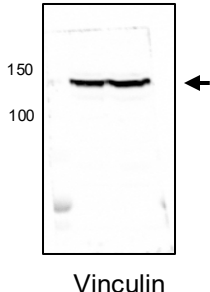

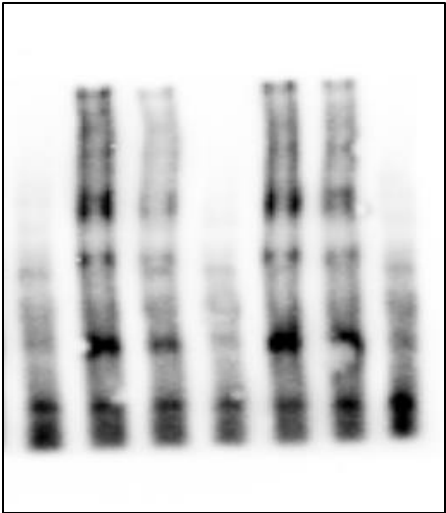

EMSA:  $\gamma$ Sat8

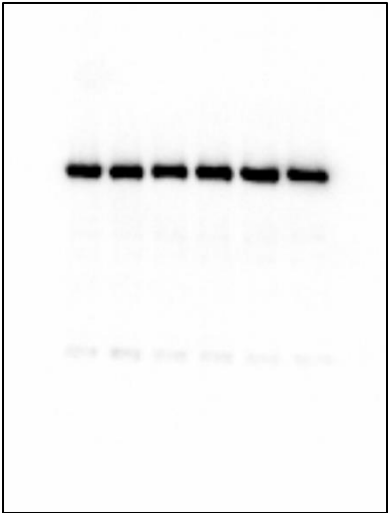

WB: Flag
